# Supplementary material for: Common Changes in Global Gene Expression Induced by RNA Polymerase Inhibitors in shigella flexneri
Source: PLoS One. 2012 Mar 12;7(3):e33240. doi: 10.1371/journal.pone.0033240 (PMC3299763; doi:10.1371/journal.pone.0033240)
Supplement: Table S4 — Expression ratios for genes that were repressed by both RX and RP. (XLS) [file pone.0033240.s004.xls]

## Sheet: Sheet2
RX						RP						Gene	Synonym	Product
0.5XMIC			1XMIC			0.5XMIC			1XMIC
10min	30min	60min	10min	30min	60min	10min	30min	60min	10min	30min	60min
Energy metabolism
0.7	0.3	0.6	0.4	0.2	0.3	0.6	0.4	0.7	0.5	0.3	0.3	fdnG	SF1751	formate dehydrogenase-N, nitrate-inducible, alpha subunit
1.1	0.5	0.3	1.3	0.9	0.3	1.1	0.4	0.2	1.4	0.6	0.2	nirB	SF3384	nitrite reductase (NAD(P)H) subunit
1	0.4	0.4	0.7	0.2	0.3	1	0.5	0.4	0.9	0.5	0.3	ydbK	SF1822	putative oxidoreductase, Fe-S subunit
0.8	0.8	0.2	0.8	0.5	0.3	0.9	2.4	0.6	0.8	0.9	0.4	lldD	SF3644	L-lactate dehydrogenase
1	0.5	0.2	0.7	0.3	0.1	1	0.8	0.3	0.7	0.3	0.2	icdA	SF1155	isocitrate dehydrogenase
0.6	0.3	0.6	0.4	0.3	0.3	0.5	0.5	0.7	0.4	0.3	0.4	fdoG	SF3970	formate dehydrogenase-O, major subunit
0.6	0.3	0.4	0.4	0.2	0.2	0.8	0.5	0.6	0.5	0.2	0.2	sdhC	SF0576	succinate dehydrogenase cytochrome b556 large membrane subunit
0.6	0.4	0.3	0.4	0.2	0.2	0.7	0.8	0.7	0.7	0.3	0.2	sdhA	SF0574	succinate dehydrogenase flavoprotein subunit
0.8	0.8	0.5	0.8	0.4	0.4	0.8	1.7	0.4	0.7	0.6	0.3	ppc	SF4033	phosphoenolpyruvate carboxylase
0.9	0.4	0.2	1.1	0.3	0.1	0.9	0.6	0.2	0.9	0.4	0.1	frdA	SF4312	fumarate reductase flavoprotein subunit
0.6	0.3	0.3	0.4	0.1	0.1	0.7	0.6	0.6	0.5	0.3	0.1	sdhD	SF0575	succinate dehydrogenase cytochrome b556 small membrane subunit
0.6	0.4	0.3	0.4	0.1	0.1	0.9	0.6	0.6	0.6	0.3	0.2	sdhB	SF0573	succinate dehydrogenase iron-sulfur subunit
0.9	0.6	0.5	0.7	0.4	0.3	1	0.8	0.4	0.9	0.5	0.2	dld	SF2218	D-lactate dehydrogenase
1	0.5	0.3	0.9	0.4	0.3	1.1	0.8	0.4	1.1	0.6	0.3	frdD	SF4309	fumarate reductase subunit D
0.9	0.4	0.2	1	0.2	0.1	1.2	0.6	0.3	1.3	0.4	0.1	frdB	SF4311	fumarate reductase iron-sulfur subunit
0.8	0.3	0.6	-	0.2	0.4	-	0.3	0.6	0.5	0.2	0.3	aceF	SF0112	dihydrolipoamide acetyltransferase
1.1	-	0.5	-	0.4	0.4	1	0.7	0.8	0.9	0.5	0.4	lpdA	SF0113	dihydrolipoamide dehydrogenase
0.7	0.7	0.4	0.7	0.3	0.2	1	2.2	0.9	0.8	0.7	0.4	gltA	SF0577	type II citrate synthase
1	0.9	0.3	1.2	1.3	0.4	1	1.1	0.2	1.6	0.9	0.2	narG	SF1227	nitrate reductase 1 alpha subunit
1	0.4	0.4	0.9	0.3	0.3	1.1	0.8	0.4	1.1	0.6	0.3	-	SF1480	succinylglutamic semialdehyde dehydrogenase
0.8	0.4	0.3	0.8	0.3	0.2	0.9	0.7	0.2	0.6	0.4	0.1	adhE	SF1240	bifunctional acetaldehyde-CoA/alcohol dehydrogenase
Carbohydrate metabolism
0.8	0.8	0.2	1	0.6	0.1	1.3	1	0.5	1.2	0.6	0.2	manY	SF1410	PTS enzyme IIC
0.8	0.6	0.3	0.7	0.3	0.2	0.9	0.9	0.3	0.7	0.5	0.3	manX	SF1411	PTS enzyme IIAB
1.1	0.6	0.4	1.2	0.4	0.3	1	0.6	0.3	1	0.5	0.3	-	SF1505	hypothetical protein
0.9	0.4	0.6	0.6	0.4	0.4	0.7	0.5	0.4	0.6	0.4	0.5	proP	SF4112	proline/glycine betaine transporter
0.7	0.4	0.4	0.7	0.4	0.5	0.8	0.4	0.3	0.6	0.3	0.3	epd	SF2912	erythrose 4-phosphate dehydrogenase
0.4	0.2	0.4	0.3	0.1	0.2	0.7	0.3	0.2	0.5	0.2	0.1	fruK	SF2253	1-phosphofructokinase
0.8	0.3	0.3	0.7	0.3	0.2	1	0.6	0.3	0.8	0.4	0.3	yeaD	SF1443	hypothetical protein
0.8	0.4	0.4	0.6	0.3	0.3	0.8	0.7	0.4	0.6	0.5	0.3	mgsA	SF0965	methylglyoxal synthase
1.1	0.6	0.6	0.9	0.4	0.3	1.1	0.5	0.8	1	0.5	0.4	ptsG	SF1105	PTS system glucose-specific transporter subunits IIBC
0.4	0.2	0.5	0.3	0.1	0.2	0.7	0.2	0.2	0.5	0.1	0.1	fruA	SF2252	PTS system fructose-specific transporter subunits IIBC
0.3	0.1	0.4	0.2	-	0.1	0.5	-	0.2	0.4	0.2	0.1	fruB	SF2254	bifunctional PTS system fructose-specific transporter subunit IIA/HPr protein
0.6	0.3	0.2	0.6	0.3	0.2	1	0.5	0.2	0.9	0.3	0.1	ycgC	SF1201	dihydroxyacetone kinase subunit M
0.4	0.3	0.2	0.6	0.2	0.1	0.5	0.3	0.2	0.4	0.2	0.1	-	SF1203	dihydroxyacetone kinase subunit DhaK
0.6	0.3	0.1	0.6	0.4	0.2	0.9	0.5	0.2	0.7	0.3	0.2	-	SF1202	dihydroxyacetone kinase subunit DhaL
1.3	0.3	0.2	1.1	0.3	0.1	1.1	0.7	0.3	0.9	0.5	0.2	gapA	SF1444	glyceraldehyde-3-phosphate dehydrogenase
1.1	-	0.3	1	-	0.3	1.2	0.9	0.3	1	0.6	0.2	pgk	SF2911	phosphoglycerate kinase
0.8	0.6	0.6	0.6	0.4	0.3	1	0.8	0.4	0.7	0.5	0.3	pgi	SF4180	glucose-6-phosphate isomerase
0.7	0.4	0.4	0.6	0.4	0.3	0.8	0.6	0.4	0.6	0.4	0.3	manA	SF1636	mannose-6-phosphate isomerase
Translation
0.4	0.4	0.4	0.3	0.3	0.3	0.7	0.4	0.4	0.5	0.5	0.3	rplY	SF2272	50S ribosomal protein L25
0.5	0.5	0.4	0.3	0.3	0.2	0.7	0.5	0.6	0.5	0.5	0.4	rplL	SF4059	50S ribosomal protein L7/L12
0.6	0.3	0.1	0.5	0.2	0.1	0.5	0.2	0.1	0.3	0.2	0.2	yfiA	SF2657	translation inhibitor protein RaiA
0.5	0.6	0.6	0.2	0.2	0.2	0.7	0.4	0.7	0.4	0.5	0.5	rplI	SF4356	50S ribosomal protein L9
0.6	0.6	0.5	0.4	0.5	0.4	0.7	0.4	0.5	0.5	0.5	0.5	rplS	SF2666	50S ribosomal protein L19
0.7	0.6	0.4	-	0.4	0.3	0.8	0.5	0.4	-	-	-	rimM	SF2668	16S rRNA-processing protein RimM
0.6	0.7	0.5	0.3	0.5	0.3	0.8	0.6	0.5	0.5	0.4	0.4	rplW	SF3350	50S ribosomal protein L23
0.6	0.7	0.5	0.3	0.3	0.3	0.8	0.5	0.5	0.5	0.5	0.4	rpsB	SF0159	30S ribosomal protein S2
0.6	0.4	0.5	0.4	0.3	0.4	0.6	0.5	0.4	0.3	0.3	0.4	rhlB	SF3853	ATP-dependent RNA helicase RhlB
0.5	0.7	0.8	0.2	0.2	0.2	0.7	0.6	0.8	0.5	0.7	0.3	rpsF	SF4354	30S ribosomal protein S6
0.5	0.8	0.9	0.3	0.4	0.3	0.7	0.5	0.7	0.5	0.6	0.3	rplX	SF3341	50S ribosomal protein L24
0.5	0.8	1	0.3	0.4	0.3	0.9	0.4	0.7	0.5	0.4	-	rplC	SF3352	50S ribosomal protein L3
0.5	0.6	0.6	0.2	0.2	0.2	0.7	0.4	0.7	0.4	0.5	0.3	rpsR	SF4355	30S ribosomal protein S18
0.6	0.7	0.7	-	0.4	0.4	0.7	0.5	0.7	-	0.5	0.3	rplR	SF3336	50S ribosomal protein L18
0.6	0.8	0.8	0.4	0.4	0.3	0.7	0.5	0.8	0.4	0.5	0.4	rpsH	SF3338	30S ribosomal protein S8
Amino acid metabolism
1.2	2.3	0.5	0.9	2.7	0.4	1	3.3	0.5	0.9	4	0.4	cysD	SF2775	sulfate adenylyltransferase subunit 2
0.8	0.7	0.6	0.8	0.4	0.3	0.9	0.8	0.5	0.6	0.4	0.3	aroG	SF0550	phospho-2-dehydro-3-deoxyheptonate aldolase
0.7	0.4	0.4	0.7	0.2	0.4	0.9	0.8	0.3	0.6	0.3	0.3	gcvR	SF2522	glycine cleavage system transcriptional repressor
0.9	0.9	0.5	0.8	0.4	0.4	1.1	1.5	0.4	0.9	0.8	0.3	serC	SF0902	phosphoserine aminotransferase
0.8	0.6	0.3	0.7	0.3	0.2	1.1	1.3	0.4	1.2	0.5	0.2	gcvP	SF2889	glycine dehydrogenase
0.8	0.5	0.3	0.7	0.3	0.3	1	1	0.4	0.9	0.4	0.3	gcvH	SF2890	glycine cleavage system protein H
0.9	0.4	0.4	0.7	0.2	0.3	0.8	1	0.4	0.8	0.4	0.3	ybgJ	SF0586	putative carboxylase
0.6	0.4	0.4	0.4	0.4	0.3	0.4	0.3	0.6	0.3	0.2	0.4	asnA	SF3824	asparagine synthetase AsnA
0.9	0.4	0.4	0.8	0.5	0.6	0.7	0.5	0.4	0.7	0.4	0.3	thrB	SF0003	homoserine kinase
0.8	0.5	0.3	1	0.3	0.3	0.9	0.8	0.4	0.7	0.4	0.2	gcvT	SF2891	glycine cleavage system aminomethyltransferase T
0.9	0.6	0.3	0.7	0.5	0.1	0.9	1	0.3	0.7	1	0.2	cysK	SF2469	cysteine synthase A
0.8	0.5	0.6	0.7	0.4	0.4	0.7	0.7	0.7	0.5	0.4	0.4	asnB	SF0619	asparagine synthetase B
Transcription
0.7	0.4	0.4	0.4	0.4	0.3	0.7	0.3	0.4	0.4	0.2	0.2	rho	SF3856	transcription termination factor Rho
0.3	0.3	0.3	0.2	0.3	0.3	0.4	0.3	0.4	0.3	0.3	0.4	cspA	SF3589	major cold shock protein
0.8	0.4	0.5	0.6	0.4	0.4	0.7	0.5	0.4	0.5	0.3	0.4	uidR	SF1641	repressor for uid operon
1	0.4	0.5	0.9	0.3	0.3	0.9	0.4	0.7	0.8	0.5	0.5	cspE	SF0657	cold shock protein CspE
1	0.6	0.4	0.9	0.5	0.4	1	0.5	0.4	1	0.5	0.4	arcA	SF4433	two-component response regulator
0.9	0.4	0.4	0.9	0.4	0.4	0.8	0.6	0.3	0.6	0.4	0.3	csiE	SF2582	stationary phase inducible protein CsiE
cell envolope biogenesis
0.4	0.3	0.4	0.3	0.2	0.2	0.5	0.5	0.5	0.4	0.4	0.3	-	SF1205	putative adhesion and penetration protein
0.8	0.7	0.4	0.7	0.4	0.2	0.7	0.7	0.4	0.7	0.5	0.2	galE	SF0545	UDP-galactose-4-epimerase
0.5	0.4	0.3	0.5	0.3	0.4	0.5	0.4	0.4	0.5	0.2	0.3	-	SF2565	peptidoglycan synthetase; penicillin-binding protein 1B
1	-	0.2	-	0.5	0.3	1	0.8	0.3	1	0.3	0.2	ompC	SF2299	outer membrane porin protein C
0.8	0.4	0.4	1	0.6	0.5	-	0.6	0.3	-	0.7	0.4	cfa	SF1689	cyclopropane fatty acyl phospholipid synthase
0.6	0.3	0.3	0.4	0.3	0.2	0.6	0.5	0.3	0.5	0.3	0.2	slyB	SF1668	putative outer membrane protein
0.8	0.4	0.4	0.5	0.3	0.3	0.6	0.7	0.5	0.6	0.5	0.3	glmS	SF3809	glucosamine--fructose-6-phosphate aminotransferase
Coenzyme metabolism
0.9	0.5	0.4	0.8	0.4	0.3	0.9	0.8	0.3	0.9	0.4	0.2	pnuC	SF0553	PnuC protein
0.9	0.6	0.6	0.7	0.4	0.3	0.8	0.5	0.4	0.8	0.3	0.1	thiG	SF4063	thiazole synthase
0.9	0.5	0.6	0.6	0.3	0.2	0.9	0.4	0.4	0.9	0.3	0.2	thiH	SF4062	thiamine biosynthesis protein ThiH
1	-	0.4	0.8	0.3	0.2	0.9	0.5	0.3	0.7	0.2	0.1	thiC	SF4066	thiamine biosynthesis protein ThiC
1	0.6	0.4	0.9	0.5	0.4	0.9	0.5	0.3	0.8	0.3	0.2	thiE	SF4065	thiamine-phosphate pyrophosphorylase
1	0.5	0.4	0.9	0.4	0.4	0.9	0.7	0.3	1.1	0.4	0.1	nadA	SF0554	quinolinate synthetase
1.1	0.4	0.4	1.1	0.4	0.4	1.1	0.7	0.4	1.2	0.6	0.3	moaB	SF0732	molybdopterin biosynthesis protein B
Posttranslational modification
1.5	0.3	0.7	1.2	0.3	0.4	1.4	0.7	0.4	1.2	-	0.4	groES	SF4296	co-chaperonin GroES
1	0.8	0.4	0.9	0.7	0.3	1	0.8	0.5	1.2	1	0.4	yedF	SF1973	hypothetical protein
0.8	0.4	0.5	0.5	0.4	0.4	1	0.5	0.5	0.7	0.4	0.4	sspA	SF3269	stringent starvation protein A
0.8	0.5	0.4	0.6	0.4	0.3	0.8	0.6	0.6	0.6	0.4	0.4	yeaA	SF1445	methionine sulfoxide reductase B
1.5	0.2	0.4	0.9	0.1	0.2	1.3	0.5	0.5	1	0.4	0.3	groEL	SF4297	chaperonin GroEL
Signal transduction
0.8	0.7	0.6	0.7	0.5	0.4	0.8	0.8	0.5	0.7	0.4	0.4	-	SF1393	hypothetical protein
0.7	0.5	0.9	0.6	0.3	0.9	0.5	0.6	-	0.5	0.2	1	yjiY	SF4372	putative carbon starvation protein
0.7	0.3	0.4	0.6	0.3	0.3	0.7	0.4	0.4	0.6	0.3	0.3	rseA	SF2634	anti-RNA polymerase sigma factor SigE
0.8	0.5	0.3	0.8	0.3	0.2	0.9	0.4	0.3	0.7	0.3	0.2	crp	SF3376	cAMP-regulatory protein
1	0.6	0.4	1	0.5	0.3	0.9	0.8	0.5	1	0.7	0.3	ydaA	SF1837	universal stress protein UspE
0.6	0.4	0.5	0.4	0.3	0.3	0.6	0.5	0.5	0.4	0.4	0.3	fnr	SF1836	fumarate/nitrate reduction transcriptional regulator
Other genes
1.2	0.6	0.4	1.1	0.4	0.3	1.1	0.7	0.4	1.2	0.7	0.3	yccJ	SF1007	hypothetical protein
0.6	0.4	0.5	0.4	0.3	0.3	0.7	0.5	0.4	0.5	0.4	0.3	pyrG	SF2795	CTP synthetase
0.5	0.3	0.5	0.3	0.2	0.2	0.6	0.3	0.4	0.4	0.3	0.2	rhoL	SF3855	putative rho operon leader peptide
1	0.4	0.4	0.9	0.3	0.4	1	0.6	0.4	0.9	0.5	0.3	ygaM	SF2700	hypothetical protein
1.2	0.5	0.3	1	0.5	0.3	1.1	0.6	0.3	1.2	0.7	0.2	adhP	SF1747	alcohol dehydrogenase
1	0.6	0.4	1.1	0.5	0.3	0.9	0.6	0.4	0.9	0.7	0.4	-	SF1389	hypothetical protein
1.1	0.6	0.4	1.1	0.8	0.3	1.1	0.6	0.3	1.2	0.9	0.2	nirD	SF3385	nitrite reductase small subunit
0.9	0.4	0.4	0.9	0.3	0.3	0.9	0.8	0.4	0.8	0.5	0.4	ycbB	SF0922	hypothetical protein
0.7	0.4	0.4	0.6	0.3	0.3	0.6	0.3	0.3	0.4	0.2	0.2	yfeC	SF2460	hypothetical protein
0.8	0.5	0.4	1	0.4	0.5	0.8	1	0.4	0.6	0.5	0.3	smg	SF3316	hypothetical protein
0.8	0.5	0.5	0.7	0.2	0.3	0.9	0.8	0.5	0.7	0.7	0.4	ydgA	SF1637	hypothetical protein
0.4	0.5	0.7	0.2	0.5	0.8	0.4	0.4	0.4	0.2	0.5	0.3	guaB	SF2554	inosine 5'-monophosphate dehydrogenase
1.1	0.5	0.5	0.9	0.3	0.3	1	0.8	0.3	1	0.7	0.2	nadB	SF2636	pseudogene
0.8	0.5	0.5	0.6	0.5	0.4	0.8	0.5	0.4	0.7	0.5	0.3	purA	SF4332	adenylosuccinate synthetase
0.8	0.4	0.4	0.5	0.2	0.2	0.8	0.5	0.5	0.6	0.4	0.3	-	SF1446	hypothetical protein
1	0.6	0.3	1	0.4	0.4	1	0.6	0.4	0.9	0.6	0.4	yeeV	SF2999	hypothetical protein
0.9	0.4	0.3	0.7	0.5	0.4	0.8	0.7	0.3	0.9	0.4	0.3	dcuA	SF4292	anaerobic C4-dicarboxylate transporter
0.7	0.5	0.5	0.5	0.4	0.3	0.7	0.5	0.5	0.4	0.6	0.4	yefM	SF2079	antitoxin YefM
1.1	0.6	0.3	1.3	0.5	0.2	1.2	1.1	0.4	1.5	0.7	0.4	ycfP	SF1112	hypothetical protein
0.8	0.5	0.4	0.7	0.2	0.2	1	0.7	0.6	0.9	0.5	0.5	-	SF0572	hypothetical protein
0.8	0.3	0.7	0.7	0.4	0.5	0.7	0.3	0.6	0.5	0.2	0.4	yfeK	SF2474	hypothetical protein
1.4	0.5	0.2	1.9	0.6	0.3	1.4	0.6	0.3	1.8	0.5	0.4	bfr	SF3355	bacterioferritin
0.9	0.4	0.4	0.9	0.4	0.3	0.9	0.7	0.5	0.9	0.6	0.4	yfiD	SF2641	autonomous glycyl radical cofactor GrcA
0.8	0.5	0.4	0.7	0.7	0.5	0.8	0.4	0.3	0.6	0.4	0.4	ybhQ	SF0741	hypothetical protein
1	0.4	0.4	1.2	0.3	0.4	1.1	0.6	0.3	0.9	0.5	0.3	ycgB	SF1177	SpoVR family protein
0.9	0.6	0.5	0.7	0.4	0.2	0.9	0.7	0.5	0.7	0.6	0.3	yeeX	SF2067	hypothetical protein
0.9	0.5	0.5	0.7	0.4	0.3	0.7	1.1	0.4	0.7	0.5	0.2	ybgI	SF0587	putative hydrolase-oxidase
0.9	0.7	0.7	1	0.3	0.5	0.9	0.6	0.6	1	0.4	0.2	-	SF0712	putative tail component of prophage CP-933K
0.8	0.7	0.8	0.4	0.3	0.3	0.8	0.8	1	0.7	0.5	0.4	fabB	SF2399	3-oxoacyl-(acyl carrier protein) synthase I
0.7	0.4	0.3	0.7	0.2	0.2	0.8	0.6	0.3	0.7	0.3	0.2	ygdH	SF2808	hypothetical protein
0.4	0.3	0.4	0.4	0.4	0.6	0.4	0.2	0.3	0.3	0.2	0.5	xseA	SF2555	exodeoxyribonuclease VII large subunit
1.1	0.6	0.4	1	0.5	0.4	1.1	0.7	0.4	1	0.5	0.3	ybeL	SF0638	hypothetical protein
1	0.6	0.4	0.8	0.4	0.4	1	0.9	0.4	0.9	0.5	0.4	yjeI	SF4298	hypothetical protein
0.8	0.4	0.4	0.7	0.3	0.3	1	0.8	0.6	0.7	0.5	0.2	minD	SF1162	cell division inhibitor MinD
0.9	0.4	0.4	0.8	0.5	0.4	0.7	0.5	0.3	0.5	0.4	0.2	yjfO	SF4344	putative biofilm stress and motility protein A
0.8	0.5	0.3	0.7	0.3	0.2	0.8	0.7	0.4	0.5	0.3	0.2	ucpA	SF2480	short chain dehydrogenase
1.1	-	0.3	0.9	-	0.3	1.1	1	0.3	0.9	0.5	0.1	ygfF	SF2888	hypothetical protein
1.1	0.5	0.6	0.9	0.2	0.3	1.1	0.7	0.6	0.8	0.4	0.3	sodA	SF3985	superoxide dismutase
0.7	0.4	0.3	0.8	0.5	0.4	1.2	0.7	0.3	1.1	0.5	0.2	-	SF2045	hypothetical protein
1	0.7	0.4	1.2	0.8	0.4	1.1	0.6	0.4	1.1	0.6	0.5	SF1609	SF1609	pseudogene
